# Supplementary material for: Historical gene flow constraints in a northeastern Atlantic fish: phylogeography of the ballan wrasse Labrus bergylta across its distribution range
Source: PubMed Central journal article supplement (PMC5367310; doi:10.1098/rsos.160773), 2017-02-15
Supplement: rsos160773supp1.pdf [file rsos160773supp1.pdf]

## Appendix II

Polymerase Chain Reactions (PCR) were performed in a 20µl total reaction volume with 10 µl of REExtract-N-ampl PCR reaction mix (Sigma – Aldrich), 0.8µl of each primer (10µM), 4.4µl of Sigma-water, and 4µl of template DNA. The mitochondrial control region (CR) and the first intron of the nuclear S7 ribosomal protein gene (S7) were amplified using the following pairs of primers: L-pro1 (5' ACTCTCACCCCTAGCTCCCAAAG 3') and H-DL1 (5' CTGAAGTAGGAACCAGATGCCAG 3') [38] for the CR, and S7RPEX1F (5'-TGG CCT CTT CCT TGG CCG TC-3') and S7RPEX2R (5'-AAC TCG TCT GGC TTT TCG CC-3') [39]. An initial denaturation at 94°C for 7' was followed by 35/30 cycles (denaturation at 94°C for 30/45'', annealing at 55°C for 30/45'', and extension at 72°C for 1'; values CR/S7, respectively) and a final extension at 72°C for 7' on a Bio-Rad Mycycler thermal cycler. The same primers were used for the sequencing reaction, and the PCR products were purified and sequenced in STABVIDA (<http://www.stabvida.net/>).
